# Cross-kingdom signalling regulates spore germination in the moss *Physcomitrella patens*

Eleanor F. Vesty<sup>1,2</sup>, Amy L. Whitbread<sup>1,3+</sup>, Sarah Needs<sup>1,4+</sup>, Wesal Tanko<sup>1+</sup>, Kirsty Jones<sup>1+</sup>, Nigel Halliday<sup>5</sup>, Fatemeh Ghaderiardakani<sup>1</sup>, Xiaoguang Liu<sup>5,6</sup>, Miguel Cámara<sup>5\*</sup>, Juliet C. Coates<sup>1\*</sup>.

<sup>1</sup> School of Biosciences, University of Birmingham, Edgbaston, Birmingham, UK.

<sup>2</sup> University Centre Shrewsbury, Guildhall, Frankwell Quay, Shrewsbury, Shropshire, UK

<sup>3</sup> Karlsruhe Institute of Technology, Karlsruhe, Baden-Württemberg, Germany

<sup>4</sup> School of Life, Health and Chemical Sciences, Open University, Walton Hall, Kents Hill, Milton Keynes, UK

<sup>5</sup> National Biofilm Innovations Centre, Centre for Biomolecular Sciences, School of Life Sciences, University of Nottingham, University Park, Nottingham, UK.

<sup>6</sup> Institute of Life Sciences, Jiangsu University, Zhenjiang, China

## \*Correspondence:

Dr. Juliet Coates [j.c.coates@bham.ac.uk](mailto:j.c.coates@bham.ac.uk)

Prof. Miguel Cámara [Miguel.camara@nottingham.ac.uk](mailto:Miguel.camara@nottingham.ac.uk)

+ These authors contributed equally to this work.

## ABSTRACT

Plants live in close association with microorganisms that can have beneficial or detrimental effects. The activity of bacteria in association with flowering plants has been extensively analysed. Bacteria use quorum-sensing as a way of monitoring their population density and interacting with their environment. A key group of quorum sensing molecules in Gram-negative bacteria are the *N*-acylhomoserine lactones (AHLs), which are known to affect the growth and development of both flowering plants, including crops, and marine algae. Thus, AHLs have potentially important roles in agriculture and aquaculture. Nothing is known about the effects of AHLs on the earliest-diverging land plants, thus the evolution of AHL-mediated bacterial-plant- and algal interactions is unknown. In this paper, we show that AHLs can affect spore germination in a representative of the earliest plants on land, the Bryophyte moss *Physcomitrella patens*. Furthermore, we demonstrate that sporophytes of wild isolates of *Physcomitrella patens* are associated with AHL-producing bacteria.

## Introduction

Plants do not exist in isolation in the environment, but interact with a wide array of organisms from all kingdoms including bacteria, fungi, animals and other plants. These interactions can have profound effects on plant fitness, growth and development. In addition to pathogenicity or parasitism, interactions between plants and other organisms can be beneficial. Examples include interactions between fungi and plants in the form of mycorrhizae and interactions between plants and bacteria<sup>1-3</sup>.

Interactions between plants and microorganisms have become more elaborate during plant evolution. Mycorrhizal interactions are beneficial in liverworts, one of the earliest diverging groups of land plants, where the association between liverworts and fungi boosts plant photosynthesis, growth, fitness and nitrogen/phosphorus uptake<sup>4,5</sup>. In later-diverging plants including flowering plants, interactions with

48 microorganisms have increased in complexity. For example, in legumes (Fabaceae, including beans  
49 and pulses) plant root cells are surrounded by a group of proteobacteria (Rhizobia) and form a  
50 symbiotic root nodule<sup>6</sup> while actinobacteria from the *Frankia* genus can form nodules with a wide  
51 range of plant families<sup>7,8</sup>. The bacteria gain carbon from the plant, while the plant gains nitrogen from  
52 the bacteria. Not all plant-bacterial interactions are so highly specialised: many bacteria in the  
53 rhizosphere contribute to plant productivity and gain from plants in return<sup>9</sup>.

54  
55 It has become clear that flowering plants can respond to bacterial signalling molecules that alter plant  
56 growth and development, representing inter-kingdom interaction<sup>10,11</sup>. The perception of bacteria by  
57 plants is of significant importance in terms of monitoring their surroundings and thus being able to  
58 respond accordingly to enhance their chances of survival<sup>12</sup>.

59  
60 A key way in which bacteria communicate with one another is via diffusible quorum sensing (QS)  
61 molecules that are used to monitor and respond to population density within a colony or biofilm<sup>13–19</sup>.  
62 One well-characterised subset of QS molecules that affect plants behaviour are the *N*-acylhomoserine  
63 lactones (AHLs)<sup>11,12,20–24</sup>. AHLs are produced by Gram-negative bacteria<sup>25</sup> and are key for the control  
64 of multiple gene expression in a coordinated manner within a population<sup>25–27</sup>.

65  
66 AHLs vary in their structure in nature with a wide range of acyl chain lengths, from four to eighteen  
67 carbons, and level of saturation. Furthermore, at the third carbon position (C3), different substitutions  
68 can also occur whereby the molecule can either be unsubstituted, contain a ketone group (oxo) or a  
69 hydroxyl group (OH). These structural differences contribute to their specific impact on gene  
70 expression<sup>28,29</sup>.

71  
72 A wide range of Gram-negative plant-associated bacteria produce AHLs and some non-producers are  
73 still able to sense and respond to the presence of these molecules using *luxR*-solo AHL receptor proteins  
74<sup>30,31</sup>. The ability of plants to detect and respond to the presence of AHLs may be a result of their  
75 coevolution with AHL-producing bacteria. Plant perception of AHLs may provide an evolutionary  
76 advantage over their associated microbial community, especially if the bacteria are pathogenic,  
77 enabling the plants to detect increasing bacterial populations and alter the QS outcome<sup>32</sup>. Plant  
78 responses to AHLs are dependent on the structure and concentration of the AHL encountered and can  
79 be positive or negative in terms of growth<sup>33,34</sup>. Plant-bacterial interaction often occurs in the  
80 rhizosphere where roots in the soil come into contact with AHLs in varying concentrations due to  
81 bacterial growth<sup>21,35,36</sup>. Flowering plants respond to these bacterial compounds and even absorb them  
82 from the surrounding environment<sup>37</sup>. The role of QS in legume nodule formation seems to vary  
83 depending on the combination of plant and bacterium under investigation (reviewed in<sup>34</sup>).

84  
85 Certain plant species produce AHL mimics that induce a premature quorum-sensing response in  
86 bacteria that serves to protect the plant from pathogens, or aid establishment of symbiotic relationships  
87<sup>38–42</sup>. Conversely, plants can produce anti-QS molecules and use “quorum quenching” to interfere with  
88 bacterial QS signalling mechanisms preventing transcription of specific gene sets, thus averting the  
89 synthesis of virulence factors by pathogenic bacteria<sup>43,44</sup>. The exact mechanisms by which plants  
90 perceive AHLs is currently unknown, but these molecules can affect the activity of endogenous plant  
91 signalling, such as calcium signalling<sup>45,46</sup>, G-protein signalling<sup>47,48</sup>, stress signalling and metabolism  
92<sup>23,49</sup> and hormone signalling<sup>22</sup> causing downstream effects on plant growth.

93  
94 In plants, AHL perception induces a “primed” state, regulating plant immunity<sup>12</sup>. Tomato plants  
95 (*Solanum lycopersicum*) became resistant to *Alternaria alternata*, a pathogenic fungus, following co-  
96 culture with wild-type *Serratia liquefaciens* bacteria, whereas no induced resistance occurred

97 following the growth of a corresponding *Serratia* AHL-deficient mutant<sup>50</sup>. In the model plant  
98 *Arabidopsis thaliana*, resistance against both bacterial and fungal pathogens was observed following  
99 the exogenous application of synthetic AHLs<sup>12</sup>. However, it is not just plant immunity that is affected  
100 by QS signal molecules: AHLs also affect plant growth, development and physiology. Addition of  
101 AHL to plants modifies protein profiles by inducing changes in gene expression<sup>45,51</sup>, altering the  
102 formation of roots<sup>11,20-23</sup>, including the promotion of adventitious root growth<sup>24</sup>. Plant-growth-  
103 promoting bacteria employ QS systems which aid with the colonisation of the rhizosphere, providing  
104 benefit for both bacteria and host plant<sup>52,53</sup>. The ecology of rhizosphere bacterial populations on *S.*  
105 *lycopersicum* is modulated by AHLs produced by bacteria a significant distance away, due to the  
106 movement of the compounds through the rhizosphere via diffusion<sup>14,54</sup>. Furthermore, there are  
107 potential beneficial effects of the by-products of AHL degradation. Exogenous application of  
108 homoserine lactones, and homoserine, the degradation products of AHLs, to bean roots increased the  
109 stomatal conductance of the plants, which in turn led to enhanced mineral nutrient availability,  
110 benefiting both the host plant and rhizosphere-associated bacteria<sup>55</sup>.

111  
112 Plant-produced compounds, such as strigolactones and alkamides, share structural similarity to the  
113 bacteria-generated AHL molecules. Consequently, it is not surprising that QS molecules impose effects  
114 on the growth and development of plants, as both alkamides and strigolactones are known to induce a  
115 number of morphological responses, including changes in root architecture<sup>21</sup>. An intact homoserine  
116 lactone ring structure is not always required for plants to detect AHLs<sup>33</sup>.

117  
118 All plants on land arose from aquatic ancestors: the appearance of plants on land was a key evolutionary  
119 transition. Relatively little is known about the effects bacteria have on development in ancient plant  
120 lineages<sup>56</sup>. The earliest land plants were small and in close contact with their substrate (and associated  
121 microorganisms) over the whole of their anatomy rather than just via their roots. The earliest-diverging  
122 lineage of land plants, the spore-bearing mosses, liverworts and hornworts (Bryophytes) play a key  
123 role in ecology as carbon sinks in peat bogs and permafrosts<sup>57</sup> and have been used by humans for their  
124 absorptive and medicinal properties for thousands of years<sup>58-60</sup>.

125  
126 The microbiome of *Sphagnum* moss harbours diverse bacteria and is substantially different from that  
127 of flowering plants with the potential to enable plant- and ecosystem adaptation to climate change<sup>56,61-</sup>  
128 <sup>63</sup>. The microbiomes of a co-occurring epiphytic moss (*Pterygynandrum filiforme*) and its flowering  
129 plant host (*Acer pseudoplatanis*) show distinct characteristics<sup>64</sup>. Moreover, different moss species  
130 from different habitats possess distinct microbiomes with some overlap in properties and function<sup>65,66</sup>.

131  
132 Whether bacterial signalling molecules can directly affect developmental processes in non-flowering  
133 plants is largely unknown. A symbiotic bacterium (*Methylobacterium*) from the moss *Funaria*  
134 *hygrometrica* exerted a cytokinin-like effect on moss development, enabling formation of buds, and  
135 promoted filament growth via cell division<sup>67,68</sup>. Evidence from marine seaweeds (macroalgae), which  
136 share a common ancestor with land plants, demonstrates that AHLs from algal-associated bacteria can  
137 affect algal growth, development and cell behaviour<sup>69-72</sup>. Motile, reproductive spores of the green  
138 seaweed *Ulva* sense and are attracted to AHLs produced by bacterial biofilms, which influence spore  
139 settlement and swimming rate<sup>71-73</sup> and cause activation of calcium signaling in the spores<sup>72</sup>. AHLs  
140 from *Shewanella* and *Sulfitobacter* inhibit early development of the green seaweed *Ulva* from spores  
141 and synthetic *N*-dodecanoyl-L-homoserine lactone (C12-HSL) inhibits early *Ulva* development at  
142 concentrations above 5µM<sup>69</sup>. AHLs (*N*-butanoyl-L-homoserine lactone (C4-HSL) and *N*-hexanoyl-L-  
143 homoserine lactone (C6-HSL)) from *Shewanella* promote reproductive carpospore release in the red  
144 seaweed *Gracilaria dura* at micromolar concentrations<sup>70</sup>.

145

146 We therefore hypothesised that AHLs might affect development in early-diverging land plants. In this  
147 paper, we show that synthetic AHLs can promote spore germination in the model moss species  
148 *Physcomitrella patens*<sup>74,75</sup> in a lab-based assay. Moreover, sporophytes from wild isolates of  
149 *Physcomitrella patens* are associated with AHL-producing bacteria, suggesting these bacteria may  
150 influence spore germination in the environment through the production of AHL signal molecules.

151

## 152 Results

153

### 154 AHLs promote *Physcomitrella* spore germination at sub-micromolar concentrations 155 but inhibit spore germination at concentrations above 1 $\mu$ M.

156 Previous studies have shown that AHLs at concentrations of 1-10 $\mu$ M can promote root growth in the  
157 model flowering plant *Arabidopsis* (Jin et al., 2012; Liu et al., 2012; vonRad et al., 2008; Zhao et al.,  
158 2015). In algae, AHLs at 2-10 $\mu$ M can promote spore release<sup>70</sup> or reduce the progress of growth and  
159 development from spores<sup>69</sup>. We tested the effect of a range of AHLs with different carbon *N*-acyl  
160 chains lengths at 0.1 $\mu$ M and 1 $\mu$ M concentrations on the spore germination of the model moss  
161 *Physcomitrella patens*. All AHLs (C4-HSL to C12-HSL) induce a significantly faster spore  
162 germination rate compared to a solvent-only control (Figure 1). C4-HSL and C6-HSL show a similar  
163 promotion of germination at both 0.1 $\mu$ M and 1 $\mu$ M concentrations (Figure 1A, B). C8-HSL appears to  
164 have slightly more germination-promoting activity than the shorter chain AHLs and is more potent at  
165 1 $\mu$ M than 0.1 $\mu$ M (Figure 1C). C10-HSL and C12-HSL are the most potent germination-promoting  
166 AHLs, being more effective at 0.1 $\mu$ M than at 1 $\mu$ M concentration (Figure 1D, E).

167 In *Arabidopsis*, 50-100 $\mu$ M concentrations of AHLs inhibit root growth<sup>21,45,48</sup> while in the seaweed  
168 *Ulva* spore germination and early development is reduced with just 5 $\mu$ M AHLs<sup>69</sup>. We tested the effects  
169 of a range of AHLs at 5 $\mu$ M on *Physcomitrella* spore germination and found that AHLs could inhibit  
170 spore germination (Figure 2A). The effect appeared strongest with C10-HSL, which also inhibited  
171 germination at 10 $\mu$ M, in a dose-dependent manner (Figure 2B). Taken together, these data show that  
172 AHLs, particularly those with longer chain length, accelerate spore germination when at low ( $\leq$ 1 $\mu$ M)  
173 concentrations and inhibit spore germination at higher (5-10 $\mu$ M) concentrations.

174

### 175 Chain length and side group substitution affect the activity of AHLs against 176 *Physcomitrella* spore germination.

177 To investigate whether changing the side group of the AHL had an effect on biological activity, we  
178 assayed the spore-germination-promoting activity of C4-C12 AHLs, namely the *N*-acyl version (as  
179 before) and also the 3-oxo (3-O) and 3-hydroxy (3-OH) substituted forms. Our “snapshot” data (Figure  
180 3A) indicated potential differences in potency between the different side chains, particularly for AHLs  
181 with longer carbon chain. To investigate these differences further, we assayed spore germination in the  
182 presence of 3-OH and 3-O substitutions of the C10 and C12 HSLs, which consistently through this  
183 study showed some of highest activity, over a range of concentrations from 2nM to 1 $\mu$ M (summarised  
184 in Figure 3B; data in Supplemental Figure 1). The *N*-acyl variants of C10- and C12-HSL showed the  
185 greatest spore germination-promoting activity at 2-10nM (Figure 3B; Supplemental Figure 1A and  
186 1D). 3-OH-C10-HSL variant showed greatest spore germination promotion at 10nM whereas the 3-  
187 OH-C12-HSL showed similar spore germination-promotion from 10nM-1 $\mu$ M, slightly higher at 1 $\mu$ M  
188 (Figure 3B; Supplemental Figure 1B and 1E). The 3-O variants of C10- and C12-HSL showed greatest  
189 spore germination-promoting activity at 0.1 $\mu$ M concentration, indicating somewhat reduced potency  
190 compared to the other two types of AHLs (Figure 3B; Supplemental Figure 1C and 1F). These data  
191 demonstrate that both chain length and side group substitution can affect the biological activity of  
192 exogenously-applied synthetic HSLs on *Physcomitrella* spore germination.

193

194  
195  
196  
197  
198  
199  
200  
201  
202  
203  
204  
205  
206  
207  
208  
209  
210  
211  
212  
213  
214  
215  
216  
217  
218  
219  
220  
221  
222  
223  
224  
225  
226  
227  
228  
229  
230  
231  
232  
233  
234  
235  
236  
237  
238  
239  
240  
241

## **Sporophytes from wild isolates of *Physcomitrella* are associated with multiple species of bacteria, some of which produce AHLs.**

To determine whether the observed effects of synthetic AHLs on *Physcomitrella patens* spore germination in a lab-based assay might have relevance to wild populations found in the environment, sporulating *Physcomitrella* plants were firstly collected from 3 different locations in the UK with a view to determine the bacterial populations associated with them and the ability of these bacteria to produce AHLs. A total of 12 plants were selected from each sampled location and the sporophyte from each plant was isolated to enable isolation of its associated bacteria (a consortium from each sporophyte). Bacterial consortia were obtained from 30 out of 36 sporophytes. Each individual sporophyte's (assumed mixed) bacterial populations were taken through multiple rounds of streaking to isolate individual strains associated with *Physcomitrella*. To identify each strain, a fragment of the 16S rRNA gene was amplified from genomic DNA and sequenced. Our sampling of bacteria associated with *Physcomitrella* sporophytes identified largely Proteobacteria from the class Gamma-proteobacteria. Bacteria of the genus *Pseudomonas* were found at all 3 sites (at least 5 different species), as was *Stenotrophomonas* (2 species). *Serratia* (2 species) were isolated from 2 sites and *Acinetobacter*, *Aeromonas* and *Rahnella* were each recovered from a single site. The gram-positive bacteria *Microbacterium* (Actinobacteria) and *Bacillus* (Firmicutes) were each found at a single site (Table 1).

For an initial survey of whether the isolated bacterial consortia from each sporophyte could produce AHLs, consortia were analysed by a mass-spectrometry (LC-MS/MS) approach, which demonstrated that consortia from all three locations could produce AHLs although these were detected to only a limited extent from the Lindley site (Table 2).

To determine whether the individual bacteria isolated from wild *Physcomitrella* could produce detectable AHLs, cultures of the Gram-negative bacterial isolates were subjected to AHL analysis by LC-MS/MS. Just under half of the bacterial isolates from each of Chew Valley and Stocks reservoir produced detectable AHLs, while no AHLs were detected from the bacteria from Lindley. Representatives of *N*-acyl, 3-O and 3-OH from C4 to C10 chain length were detected (Figure 4). Overall, the most frequently detected AHLs were C6-HSL and 3-O-C8-HSL. The most frequently detected AHL in bacteria from Chew Valley was 3-OH-C10-HSL, whereas that from Stocks was 3-O-C6-HSL.

Taken together, these data show that some of the bacteria associated with *Physcomitrella* sporophytes from different geographical locations can produce a range of AHLs.

## **Discussion**

Our experiments show for the first time that synthetic AHLs can affect the spore germination of an early diverging land plant, the bryophyte *Physcomitrella patens*, in a lab-based assay. Low (<1µM) concentrations of AHLs promote spore germination whilst higher concentrations (5-10µM) inhibit spore germination. In general, AHLs with longer chain length (C8-C12) have a more potent effect than C4-C6 AHLs and side-group substitutions change the potency of germination-promoting activity with 3-O and 3-OH substitutions generally showing a slight reduction in potency.

The inhibitory effect of higher concentrations of AHLs is reminiscent of their effect in the green seaweed *Ulva* where >5µM AHLs can inhibit the early development and growth of new plants from zoospores<sup>69</sup>. Higher concentrations (25-125µM) of long-chain AHLs can also inhibit *Ulva* spore swimming speed to promote settlement with 3-O substitutions showing the greatest inhibition<sup>71</sup>. The effect of sub-micromolar concentrations AHLs was not investigated in these experiments.

In land plants, the effect of AHLs on germination of the desiccation-resistant dispersal units, namely spores (in Bryophytes, Lycophytes and ferns) or seeds (in Gymnosperms and Angiosperms) is not well

242 studied. So far, a single study shows that priming of winter wheat (*Triticum aestivum* L.) seeds with  
243 C6-HSL (~9ng AHL per seed) improves their germination and subsequent growth, development and  
244 biomass production <sup>76</sup>. Thus, a potential role in germination control for AHLs is present across plant-  
245 and algal taxa, although whether this is as a result of convergent or divergent evolution is unknown.  
246 AHLs have a range of effects on post-germination development and growth in seed plants. For  
247 example, 1-10 $\mu$ M of 3O-C6-HSL and 3O-C8-HSL, and 10 $\mu$ M C4-HSL, C6-HSL, C8-HSL can  
248 increase *Arabidopsis* primary root elongation <sup>22,45,47,48,51</sup> while >10 $\mu$ M of C10-C14 AHLs inhibit  
249 primary root growth in *Arabidopsis* seedlings <sup>21,48</sup>. Moreover C10 and C12 AHLs promote root  
250 branching and increases root hair formation at 12-96 $\mu$ M <sup>21</sup>. Inhibitory effects of AHLs on the  
251 *Arabidopsis* root involve changes in cell division and differentiation <sup>21</sup>. This biphasic pattern (growth  
252 stimulation of *Arabidopsis* primary root at low concentrations, growth inhibition at higher  
253 concentrations) is reminiscent of what we see with *Physcomitrella* spore germination (Figures 1-3). In  
254 general, longer-chain AHLs (C10, C12) have more potent effects, as we saw with *Physcomitrella* spore  
255 germination in this paper, although the concentrations required for an effect in *Arabidopsis* are higher  
256 ( $\geq 1\mu$ M) than in *Physcomitrella* (2nM-1 $\mu$ M). In barley, 10 $\mu$ M C6-HSL promotes seedling growth <sup>35</sup>.  
257 Several studies hint at the molecular mechanisms underlying the effects of AHLs on *Arabidopsis* root  
258 growth. Transcriptome- and qRT-PCR approaches coupled with mutant studies implicate several  
259 transcription factors in the response, including *AtMYB44* <sup>51</sup>, in addition to G-protein signalling <sup>47,48</sup>  
260 and calmodulin/calcium signalling <sup>45,46</sup>. Interestingly, a role for changes in intracellular calcium  
261 signalling has also been implicated in *Ulva* spore settlement, which is also affected by AHLs <sup>77</sup>.

262  
263 There is considerable overlap between the bacteria we isolated from *Physcomitrella* sporophytes and  
264 the bacteria found in associated with the peat moss *Sphagnum* <sup>56</sup> in which *Pseudomonas*, *Rahnella*,  
265 *Serratia*, *Stenotrophomonas* and *Microbacterium* are all present but *Aeromonas* and *Acinetobacter*  
266 were not detected. No *Bacillus* was detected in *Sphagnum*, although *Paenibacillus* (Firmicutes) was,  
267 along with additional Beta-proteobacteria, Bacteroidetes, and Actinobacteria <sup>56</sup>.

268 The bacteria isolated from mosses are generally different from those isolated from *Ulva*: predominantly  
269 Alpha-proteobacteria and Bacteroidetes, although *Microbacterium* has been isolated from all three  
270 species <sup>78-80</sup>. Most of the genera of Gamma-proteobacteria isolated (*Pseudomonas*, *Serratia*,  
271 *Acinetobacter*, *Aeromonas*) are AHL producers <sup>26,81-84</sup>. However, it is important to note that only a  
272 small fraction (<1%) of all bacteria that exist in a particular environment can be grown in the lab on  
273 standard growth media <sup>85</sup> so there may be many other AHL-producing bacteria associated with  
274 *Physcomitrella* in the wild.

275 Single-species AHL analysis showed that, as expected, many of the *Pseudomonas* isolates, most of the  
276 *Serratia* isolates and one of the *Aeromonas* isolates produced AHLs (Figure 4). Moreover, an isolate  
277 of *Stenotrophomonas* from each of the Chew Valley and Stocks reservoir sites also produced AHLs:  
278 this genus has not previously been found to make AHLs as it normally makes DSF-type quorum  
279 sensing molecules <sup>86</sup> which also induce growth promoting traits on plants <sup>87</sup>. Two *Pseudomonas*  
280 *fluorescences* isolates from the Stocks reservoir showed AHL production even though, to our  
281 knowledge, no strains from this species have been reported before to produce these QS molecules.  
282 Unexpectedly, none of the individual isolates from Lindley produced AHLs (Figure 4) despite several  
283 attempts, suggesting that they have either lost the ability to produce these molecules or, under the *in*  
284 *vitro* growth conditions used, they only make AHLs below the lower limit of detection for the LC-  
285 MS/MS system used.

286  
287 In summary, we have characterised for the first time the effect of bacterial quorum sensing molecules,  
288 AHLs, on the development of a non-flowering land plant, the moss *Physcomitrella patens*. AHLs  
289 promote *Physcomitrella* spore germination at sub-micromolar concentrations, but inhibit germination  
290 at higher concentrations, in a biphasic pattern reminiscent of the AHL effect on root growth in

291 flowering plants. We have shown that a range of bacteria, some of which produce AHLs, are associated  
292 with *Physcomitrella* sporophytes isolated from the wild. Future research could include a metagenomic  
293 analysis to identify all bacteria (including those that are uncultivable) associated with *Physcomitrella*,  
294 work with mutant strains of bacteria deficient in AHL production, analysis of calcium signalling in  
295 moss spores upon AHL application, isolation of moss mutant strains that cannot respond to AHLs, or  
296 transcriptomic/proteomic analysis of moss spores treated with AHLs.  
297

## 298 **Materials and Methods**

### 299 **Moss spore germination assays**

300 Germination assays were carried out as in <sup>88</sup>. Briefly, spores from at least 3 age-matched sporophytes  
301 were used within each assay with three sporophytes' worth of spores used for every 10 Petri dishes  
302 (9 cm diameter). Sporophytes were bleached in groups of two to three in 1 ml 25% Parozone™ (Jeyes  
303 Group, Thetford, UK) for 10 min and then washed three times in 1 ml sterile distilled water (10 min  
304 each) in a sterile flow cabinet. The sporophytes were then crushed in 100–200 µl of sterile water to  
305 release the spores. Spores were diluted down in sufficient sterile distilled water to allow plating of  
306 500 µl of spore solution per Petri dish. Spores were plated on cellophane-overlaid BCD moss growth  
307 medium (1mM MgSO<sub>4</sub>, 1.84mM KH<sub>2</sub>PO<sub>4</sub>, 10mM KNO<sub>3</sub>, 45µM FeSO<sub>4</sub>.7H<sub>2</sub>O, plus 1:1000 Hoagland's  
308 A-Z Trace Element Solution), supplemented with 5 mM CaCl<sub>2</sub> and 5 mM ammonium tartrate.  
309 Cellophane discs (A.A. Packaging Ltd, Preston, UK) were autoclaved wet and individually between  
310 sheets of filter paper for 15 min at 121°C, before use. Each data point included data from more than  
311 one plate and a minimum of 500 spores.  
312

### 313 **Isolation of wild *Physcomitrella patens***

314 *Physcomitrella patens* growing wild in the UK was isolated from 3 sites: Chew Valley Lake (Somerset;  
315 ST5814 6053), Stocks Reservoir (Yorkshire; SD742562) and Lindley (Yorkshire; 44/217414). A small  
316 area of moss containing ~40 individual sporulating plants each harbouring a single sporophyte was  
317 collected, and kept moist during transport to the lab, where samples were refrigerated prior to  
318 sporophyte harvesting.  
319

### 320 **Isolation and purification of bacteria**

321 Initially, 12 sporophytes from each location were placed on individual Luria broth (LB)-agar plates  
322 and bacteria were allowed to grow out from the sporophyte for 2 days at 28°C in the dark (lower  
323 temperatures favoured growth of fungal contamination). The majority of sporophytes were associated  
324 with bacteria that could be grown on LB-agar, giving rise to bacterial consortia. These consortia were  
325 further purified by taking them through 3-4 rounds of streaking (giving rise to multiple single colonies)  
326 as appropriate, growing on LB-agar at 28°C overnight to obtain multiple pure bacterial isolates  
327 (identifiable by morphology and colour) for gDNA isolation, sequence identification and AHL  
328 detection. Stock plates for each strain were generated from a single colony and colonies from these  
329 plates were inoculated into liquid culture to make permanent glycerol stocks in 25% glycerol, 75% LB.  
330

### 331 **Bacterial identification**

332 Bacterial isolates were identified to genus-, or where possible species-level. Bacterial cultures were  
333 grown in LB from single colonies and genomic DNA was extracted using a Qiagen Blood and Tissue  
334 DNeasy kit (Qiagen, Hilden, Germany) following the manufacturer's instructions. Partial 16S rDNA  
335 fragments (~2kb) were amplified from 10-30ng of genomic DNA by PCR using the forward primer  
336 27F (AGA GTT TGA TCC TGG CTC AG) and reverse primer 1522R (AAG GAG GTG ATC CAG  
337 CCG CA). PCR was carried out using Velocity proofreading DNA polymerase (Bioline) according to  
338

339 manufacturer's instructions. The PCR cycling conditions were a denaturation of 94°C for 2 min  
340 followed by 30 cycles of 94°C for 30 sec, 58 °C for 30 sec and 72°C for 1 min, then a final extension  
341 of 72°C for 5 min. PCR products were purified using a GeneJET PCR purification kit (Thermo Fisher)  
342 and were sequenced using both the forward and reverse primers via capillary sequencing on an  
343 ABI3730 machine (Applied BioSystems). Raw sequence reads viewed in SnapGene version 1.4 and  
344 were trimmed and refined by eye from the peak trace where necessary. Where possible, forward and  
345 reverse sequences were aligned and combined to generate a single consensus sequence. Sequences  
346 were analysed by BLASTN<sup>89</sup> and the closest matches recorded.

347

### 348 **AHL analysis of bacteria**

349 Bacterial cultures were grown in 5 ml of LB for 24 hr at 30°C with shaking at 200 rpm. For each  
350 sample, 1ml of filter sterilized supernatant was spiked with 5 µl of a 10µM solution of a deuterated  
351 AHL internal standard (d9-C5-AHL in MeOH). After solvent extraction (x3) with 0.5 ml aliquots of  
352 acidified ethyl acetate (0.1% (v/v) AcOH in EtOAc), combined extracts were dried under vacuum and  
353 stored at -20° prior to analysis. Dried samples were re-dissolved in 50µl of MeOH and 5.0µl of each  
354 sample injected for analysis.

355 For the analysis by LC-MS/MS, chromatography was achieved using a Shimadzu series 10AD LC  
356 system. The LC column, maintained at 40°C, was a Phenomenex Gemini C18 (3.0 µm, 100 x 3.0 mm).  
357 Mobile phases A and B were 0.1% (v/v) formic acid in water and methanol respectively. The flow rate  
358 throughout the chromatographic separation was 450µL/min. The binary gradient initially began at 10%  
359 B for 1.0 min, increased linearly to 50% B over 0.5 min, then to 99% B over 4.0 min. This composition  
360 remained for 1.5 min, decreased to 10% B over 0.1 min, and stayed at this composition for a 2.9 min  
361 period of re-equilibration.

362 For the MS detection of eluting AHLs, an Applied Biosystems Qtrap 4000 hybrid triple-quadrupole  
363 linear ion trap mass spectrometer equipped with an electrospray ionisation (ESI) interface was used.  
364 Analysis was conducted with the MS operating in positive electrospray (+ES) multiple reaction  
365 monitoring (MRM) mode, screening the LC eluent for specific unsubstituted, 3-O and 3-OH AHLs  
366 with even numbered acyl chain length from 4-14 carbons long, and the deuterated internal standard,  
367 comparing the retention time of detected analytes with authentic synthetic standards.

368

369

### 370 **References**

- 371 1. Oldroyd, G. E. D. Speak, friend, and enter: Signalling systems that promote beneficial  
372 symbiotic associations in plants. *Nat. Rev. Microbiol.* **11**, 252–263 (2013).
- 373 2. Mendes, R., Garbeva, P. & Raaijmakers, J. M. The rhizosphere microbiome: Significance of  
374 plant beneficial, plant pathogenic, and human pathogenic microorganisms. *FEMS Microbiol.*  
375 *Rev.* **37**, 634–663 (2013).
- 376 3. Ortiz-Castro, R., Contreras-Cornejo, H. A., Macías-Rodríguez, L. & López-Bucio, J. The role  
377 of microbial signals in plant growth and development. *Plant Signal. Behav.* **4**, 701–712 (2009).
- 378 4. Humphreys, C. P. *et al.* Mutualistic mycorrhiza-like symbiosis in the most ancient group of  
379 land plants. *Nat. Commun.* **1**, 103 (2010).
- 380 5. Field, K. J. *et al.* First evidence of mutualism between ancient plant lineages  
381 (Haplomitriopsida liverworts) and Mucoromycotina fungi and its response to simulated  
382 Palaeozoic changes in atmospheric CO<sub>2</sub>. *New Phytol.* **205**, 743–756 (2015).
- 383 6. Buhian, W. P. & Bensmihen, S. Mini-review: nod factor regulation of phytohormone signaling  
384 and homeostasis during rhizobia-legume symbiosis. *Front. Plant Sci.* **9**, (2018).
- 385 7. Svistoonoff, S., Hocher, V. & Gherbi, H. Actinorhizal root nodule symbioses: What is  
386 signalling telling on the origins of nodulation? *Curr. Opin. Plant Biol.* **20**, 11–18 (2014).
- 387 8. Hocher, V. *et al.* Signalling in actinorhizal root nodule symbioses. *Antonie van Leeuwenhoek*,



- 388 *Int. J. Gen. Mol. Microbiol.* **112**, 23–29 (2019).
- 389 9. Backer, R. *et al.* Plant growth-promoting rhizobacteria: Context, mechanisms of action, and  
390 roadmap to commercialization of biostimulants for sustainable agriculture. *Front. Plant Sci.* **9**,  
391 1–16 (2018).
- 392 10. Hartmann, A. & Schikora, A. Quorum Sensing of Bacteria and Trans-Kingdom Interactions of  
393 N-Acyl Homoserine Lactones with Eukaryotes. *J. Chem. Ecol.* **38**, 704–713 (2012).
- 394 11. Schikora, A., Schenk, S. T. & Hartmann, A. Beneficial effects of bacteria-plant  
395 communication based on quorum sensing molecules of the N-acyl homoserine lactone group.  
396 *Plant Mol. Biol.* **90**, 605–612 (2016).
- 397 12. Schenk, S. T. *et al.* N-acyl-homoserine lactone primes plants for cell wall reinforcement and  
398 induces resistance to bacterial pathogens via the salicylic acid/oxylinin pathway. *Plant Cell* **26**,  
399 2708–2723 (2014).
- 400 13. Cha, C., Gao, P., Chen, Y. C., Shaw, P. D. & Farrand, S. K. Production of acyl-homoserine  
401 lactone quorum-sensing signals by gram-negative plant-associated bacteria. *Mol. Plant-*  
402 *Microbe Interact.* **11**, 1119–1129 (1998).
- 403 14. Pierson, L., Wood, D. & Beck von Bodman, S. Quorum sensing in plant-associated bacteria. in  
404 *Cell-Cell Signalling* (eds. Dunney, G. & Winans, S.) 101–116 (American Society for  
405 Microbiology Press, 1999).
- 406 15. Loh, J., Pierson, E. A., Pierson, L. S., Stacey, G. & Chatterjee, A. Quorum sensing in plant-  
407 associated bacteria. *Curr. Opin. Plant Biol.* **5**, 285–90 (2002).
- 408 16. Whitehead, N. & Barnard, A. Quorum-sensing in Gram-negative bacteria. *FEMS Microbiol.*  
409 **25**, 365–404 (2001).
- 410 17. Von Bodman, S. B., Bauer, W. D. & Coplin, D. L. Quorum sensing in plant-pathogenic  
411 bacteria. *Annu Rev Phytopathol* **41**, 455–82 (2003).
- 412 18. Ramey, B. E., Koutsoudis, M., Bodman, S. B. Von & Fuqua, C. Biofilm formation in plant-  
413 microbe associations. *Curr. Opin. Microbiol.* **7**, 602–9 (2004).
- 414 19. Whiteley, M., Diggle, S. P. & Greenberg, E. P. Progress in and promise of bacterial quorum  
415 sensing research. *Nature* **551**, 313–20 (2017).
- 416 20. Mathesius, U. *et al.* Extensive and specific responses of a eukaryote to bacterial quorum-  
417 sensing signals. *Proc. Natl. Acad. Sci. U. S. A.* **100**, 1444–1449 (2003).
- 418 21. Ortiz-Castro, R., Martínez-Trujillo, M. & López-Bucio, J. N-acyl-L-homoserine lactones: A  
419 class of bacterial quorum-sensing signals alter post-embryonic root development in  
420 *Arabidopsis thaliana*. *Plant, Cell Environ.* **31**, 1497–1509 (2008).
- 421 22. Von Rad, U. *et al.* Response of *Arabidopsis thaliana* to N-hexanoyl-DL-homoserine-lactone, a  
422 bacterial quorum sensing molecule produced in the rhizosphere. *Planta* **229**, 73–85 (2008).
- 423 23. Schikora, A. *et al.* N-acyl-homoserine lactone confers resistance toward biotrophic and  
424 hemibiotrophic pathogens via altered activation of AtMPK6. *Plant Physiol.* **157**, 1407–18  
425 (2011).
- 426 24. Bai, X., Todd, C. D., Desikan, R., Yang, Y. & Hu, X. N-3-oxo-decanoyl-l-homoserine-lactone  
427 activates auxin-induced adventitious root formation via hydrogen peroxide- and nitric oxide-  
428 dependent cyclic GMP signaling in mung bean. *Plant Physiol.* **158**, 725–736 (2012).
- 429 25. Williams, P., Winzer, K., Chan, W. C. & Cámara, M. Look who’s talking: Communication  
430 and quorum sensing in the bacterial world. *Philos. Trans. R. Soc. B Biol. Sci.* **362**, 1119–1134  
431 (2007).
- 432 26. Williams, P. & Cámara, M. Quorum sensing and environmental adaptation in *Pseudomonas*  
433 *aeruginosa*: a tale of regulatory networks and multifunctional signal molecules. *Curr. Opin.*  
434 *Microbiol.* **12**, 182–191 (2009).
- 435 27. González, J. F. & Venturi, V. A novel widespread interkingdom signaling circuit. *Trends*  
436 *Plant Sci.* **18**, 167–174 (2013).

- 437 28. Scott, R. A. *et al.* Long- and short-chain plant-produced bacterial N-acyl-homoserine lactones  
438 become components of phyllosphere, rhizosphere, and soil. *Mol. Plant-Microbe Interact.* **19**,  
439 227–39 (2006).
- 440 29. Churchill, M. E. A. & Chen, L. Structural basis of acyl-homoserine lactone-dependent  
441 signaling. *Chem. Rev.* **111**, 68–85 (2011).
- 442 30. Qian, G., Xu, F., Venturi, V., Du, L. & Liu, F. Roles of a solo LuxR in the biological control  
443 agent *Lysobacter enzymogenes* strain OH11. *Phytopathology* **104**, 224–31 (2014).
- 444 31. Hudaiberdiev, S. *et al.* Census of solo LuxR genes in prokaryotic genomes. *Front. Cell. Infect.*  
445 *Microbiol.* **5**, 20 (2015).
- 446 32. Rowe, S. L., Norman, J. S. & Friesen, M. L. Coercion in the evolution of plant–microbe  
447 communication: A perspective. *Mol. Plant-Microbe Interact.* **31**, 789–794 (2018).
- 448 33. Palmer, A. G., Senechal, A. C., Mukherjee, A., Ané, J. M. & Blackwell, H. E. Plant responses  
449 to bacterial N-acyl l-homoserine lactones are dependent on enzymatic degradation to l-  
450 homoserine. *ACS Chem. Biol.* **9**, 1834–1845 (2014).
- 451 34. Calatrava-Morales, N., McIntosh, M. & Soto, M. J. Regulation mediated by N-acyl  
452 homoserine lactone quorum sensing signals in the rhizobium-legume symbiosis. *Genes*  
453 *(Basel)*. **9**, 263 (2018).
- 454 35. Klein, I., Von Rad, U. & Durner, J. Homoserine lactones: Do plants really listen to bacterial  
455 talk? *Plant Signal. Behav.* **4**, 50–51 (2009).
- 456 36. Zarkani, A. A. *et al.* Homoserine lactones influence the reaction of plants to rhizobia. *Int. J.*  
457 *Mol. Sci.* **14**, 17122–17146 (2013).
- 458 37. Sieper, T. *et al.* N-acyl-homoserine lactone uptake and systemic transport in barley rest upon  
459 active parts of the plant. *New Phytol.* **201**, 545–555 (2014).
- 460 38. Gao, M., Teplitski, M., Robinson, J. B. & Bauer, W. D. Production of substances by *Medicago*  
461 *truncatula* that affect bacterial quorum sensing. *Mol. Plant-Microbe Interact.* **16**, 827–834  
462 (2003).
- 463 39. Bauer, W. D. & Mathesius, U. Plant responses to bacterial quorum sensing signals. *Curr.*  
464 *Opin. Plant Biol.* **7**, 429–433 (2004).
- 465 40. Pérez-Montaña, F. *et al.* Rice and bean AHL-mimic quorum-sensing signals specifically  
466 interfere with the capacity to form biofilms by plant-associated bacteria. *Res. Microbiol.* **164**,  
467 749–760 (2013).
- 468 41. Corral-Lugo, A., Daddaoua, A., Ortega, A., Espinosa-Urgel, M. & Krell, T. Rosmarinic acid is  
469 a homoserine lactone mimic produced by plants that activates a bacterial quorum-sensing  
470 regulator. *Sci. Signal.* **9**, ra1 (2016).
- 471 42. Nievas, F., Vilchez, L., Giordano, W. & Bogino, P. *Arachis hypogaea* L. produces mimic and  
472 inhibitory quorum sensing like molecules. *Antonie van Leeuwenhoek, Int. J. Gen. Mol.*  
473 *Microbiol.* **110**, 891–902 (2017).
- 474 43. Manefield, M. *et al.* Halogenated furanones inhibit quorum sensing through accelerated LuxR  
475 turnover. *Microbiology* **148**, 1119–27 (2002).
- 476 44. Koh, C. L. *et al.* Plant-derived natural products as sources of anti-quorum sensing compounds.  
477 *Sensors (Switzerland)* **13**, 6217–6228 (2013).
- 478 45. Zhao, Q. *et al.* Involvement of calmodulin in regulation of primary root elongation by N-3-  
479 oxo-octanoyl homoserine lactone in *Arabidopsis thaliana*. *Front. Plant Sci.* **5**, 807 (2015).
- 480 46. Song, S., Jia, Z., Xu, J., Zhang, Z. & Bian, Z. N-butyryl-homoserine lactone, a bacterial  
481 quorum-sensing signaling molecule, induces intracellular calcium elevation in *Arabidopsis*  
482 root cells. *Biochem. Biophys. Res. Commun.* **414**, 355–360 (2011).
- 483 47. Jin, G. *et al.* Two G-protein-coupled-receptor candidates, Cand2 and Cand7, are involved in  
484 *Arabidopsis* root growth mediated by the bacterial quorum-sensing signals N-acyl-homoserine  
485 lactones. *Biochem. Biophys. Res. Commun.* **417**, 991–995 (2012).

- 486 48. Liu, F., Bian, Z., Jia, Z., Zhao, Q. & Song, S. The GCR1 and GPA1 participate in promotion  
487 of Arabidopsis primary root elongation induced by N-Acyl-homoserine lactones, the bacterial  
488 quorum-sensing signals. *Mol. Plant-Microbe Interact.* **25**, 677–683 (2012).
- 489 49. Miao, C., Liu, F., Zhao, Q., Jia, Z. & Song, S. A proteomic analysis of Arabidopsis thaliana  
490 seedling responses to 3-oxo-octanoyl-homoserine lactone, a bacterial quorum-sensing signal.  
491 *Biochem. Biophys. Res. Commun.* **427**, 293–298 (2012).
- 492 50. Schuehger, R. *et al.* Induction of systemic resistance in tomato by N-acyl-L-homoserine  
493 lactone-producing rhizosphere bacteria. *Plant, Cell Environ.* **29**, 909–918 (2006).
- 494 51. Zhao, Q. *et al.* AtMYB44 positively regulates the enhanced elongation of primary roots  
495 Induced by N-3-Oxo-Hexanoyl-homoserine lactone in Arabidopsis thaliana. *Mol. Plant-*  
496 *Microbe Interact.* **29**, 774–785 (2016).
- 497 52. Lugtenberg, B. J. J., Dekkers, L. & Bloemberg, G. V. Molecular determinants of rhizosphere  
498 colonization by Pseudomonas. *Annu. Rev. Phytopathol.* **39**, 461–90 (2001).
- 499 53. Savka, M. A., Dessaux, Y., Oger, P. & Rossbach, S. Engineering bacterial competitiveness  
500 and persistence in the phytosphere. *Mol. Plant-Microbe Interact.* **15**, 866–74 (2002).
- 501 54. Steidle, A. *et al.* Visualization of N-Acylhomoserine Lactone-Mediated Cell-Cell  
502 Communication between Bacteria Colonizing the Tomato Rhizosphere. *Appl. Environ.*  
503 *Microbiol.* **67**, 5761–5770 (2001).
- 504 55. Joseph, C. M. & Phillips, D. A. Metabolites from soil bacteria affect plant water relations.  
505 *Plant Physiol. Biochem.* **41**, 189–192 (2003).
- 506 56. Kostka, J. E. *et al.* The Sphagnum microbiome: New insights from an ancient plant lineage.  
507 *New Phytol.* **211**, 57–64 (2016).
- 508 57. Glime, J. Nutrient Relations: CO<sub>2</sub>. in *Bryophyte Ecology: Volume 1, Physiological Ecology*  
509 (Ebook sponsored by Michigan Technological University and the International Association of  
510 Bryologists., 2017).
- 511 58. Glime, J. Household and Personal Uses. in *Bryophyte Ecology: Volume 5, Uses* (Ebook  
512 sponsored by Michigan Technological University and the International Association of  
513 Bryologists., 2017).
- 514 59. Glime, J. Medical Uses: Medical Conditions. in *Bryophyte Ecology: Volume 5, Uses* (Ebook  
515 sponsored by Michigan Technological University and the International Association of  
516 Bryologists., 2017).
- 517 60. Glime, J. Medical Uses: Biologically Active Substances. in *Bryophyte Ecology: Volume 5,*  
518 *Uses* (Ebook sponsored by Michigan Technological University and the International  
519 Association of Bryologists, 2017).
- 520 61. Bragina, A. *et al.* The Sphagnum microbiome supports bog ecosystem functioning under  
521 extreme conditions. *Mol. Ecol.* **23**, 4498–4510 (2014).
- 522 62. Weston, D. J. *et al.* The Sphagnum Project: enabling ecological and evolutionary insights  
523 through a genus-level sequencing project. *New Phytol.* **217**, 16–25 (2018).
- 524 63. Weston, D. J. *et al.* Sphagnum physiology in the context of changing climate: Emergent  
525 influences of genomics, modelling and host-microbiome interactions on understanding  
526 ecosystem function. *Plant, Cell Environ.* **38**, 1737–1751 (2015).
- 527 64. Aschenbrenner, I. A., Cernava, T., Erlacher, A., Berg, G. & Grube, M. Differential sharing and  
528 distinct co-occurrence networks among spatially close bacterial microbiota of bark, mosses  
529 and lichens. *Mol. Ecol.* **26**, 2826–2838 (2017).
- 530 65. Opelt, K. & Berg, G. Diversity and antagonistic potential of bacteria associated with  
531 bryophytes from nutrient-poor habitats of the baltic sea coast. *Appl. Environ. Microbiol.* **70**,  
532 6569–6579 (2004).
- 533 66. Tian, Y. & Li, Y. H. Comparative analysis of bacteria associated with different mosses by 16S  
534 rRNA and 16S rDNA sequencing. *J. Basic Microbiol.* **57**, 57–67 (2017).

- 535 67. Hornschuh, M., Grotha, R. & Kutschera, U. Epiphytic bacteria associated with the bryophyte  
536 *Funaria hygrometrica*: Effects of *Methylobacterium* strains on protonema development. *Plant*  
537 *Biol.* **4**, 682–687 (2002).
- 538 68. Kutschera, U. Plant-associated methylobacteria as co-evolved phytosymbionts: A hypothesis.  
539 *Plant Signal. Behav.* **2**, 74–78 (2007).
- 540 69. Twigg, M. S., Tait, K., Williams, P., Atkinson, S. & Cámara, M. Interference with the  
541 germination and growth of *Ulva* zoospores by quorum-sensing molecules from *Ulva*-  
542 associated epiphytic bacteria. *Environ. Microbiol.* **16**, 445–453 (2014).
- 543 70. Singh, R. P., Baghel, R. S., Reddy, C. R. K. & Jha, B. Effect of quorum sensing signals  
544 produced by seaweed-associated bacteria on carpospore liberation from *Gracilaria dura*. *Front.*  
545 *Plant Sci.* **6**, 117 (2015).
- 546 71. Wheeler, G. L., Tait, K., Taylor, A., Brownlee, C. & Joint, I. Acyl-homoserine lactones  
547 modulate the settlement rate of zoospores of the marine alga *Ulva intestinalis* via a novel  
548 chemokinetic mechanism. *Plant, Cell Environ.* **29**, 608–618 (2006).
- 549 72. Joint, I., Tait, K. & Wheeler, G. Cross-kingdom signalling: Exploitation of bacterial quorum  
550 sensing molecules by the green seaweed *Ulva*. *Philos. Trans. R. Soc. B Biol. Sci.* **362**, 1223–  
551 1233 (2007).
- 552 73. Tait, K. *et al.* Disruption of quorum sensing in seawater abolishes attraction of zoospores of  
553 the green alga *Ulva* to bacterial biofilms. *Environ. Microbiol.* **7**, 229–240 (2005).
- 554 74. Cove, D. The Moss *Physcomitrella patens*. *Annu. Rev. Genet.* **39**, 339–358 (2005).
- 555 75. Prigge, M. J. & Bezanilla, M. Evolutionary crossroads in developmental biology:  
556 *Physcomitrella patens*. *Development* **137**, 3535–3543 (2010).
- 557 76. Moshynets, O. V. *et al.* Priming winter wheat seeds with the bacterial quorum sensing signal  
558 N-hexanoyl-L-homoserine lactone (C6-HSL) shows potential to improve plant growth and  
559 seed yield. *PLoS One* **14**, e0209460 (2019).
- 560 77. Thompson, S. E. M. *et al.* Membrane recycling and calcium dynamics during settlement and  
561 adhesion of zoospores of the green alga *Ulva linza*. *Plant, Cell Environ.* **30**, 733–744 (2007).
- 562 78. Tait, K. *et al.* Turnover of quorum sensing signal molecules modulates cross-kingdom  
563 signalling. *Environ. Microbiol.* **11**, 1792–802 (2009).
- 564 79. Burke, C., Thomas, T., Lewis, M., Steinberg, P. & Kjelleberg, S. Composition, uniqueness and  
565 variability of the epiphytic bacterial community of the green alga *Ulva australis*. *ISME J.* **5**,  
566 590–600 (2011).
- 567 80. Ghaderiadekani, F., Coates, J. C. & Wichard, T. Bacteria-induced morphogenesis of *Ulva*  
568 *intestinalis* and *Ulva mutabilis* (Chlorophyta): a contribution to the lottery theory. *FEMS*  
569 *Microbiol. Ecol.* **93**, fix094 (2017).
- 570 81. Jung, B. K. *et al.* Genomic and phenotypic analyses of *Serratia fonticola* strain GS2: a  
571 rhizobacterium isolated from sesame rhizosphere that promotes plant growth and produces N-  
572 acyl homoserine lactone. *J. Biotechnol.* **241**, 158–162 (2017).
- 573 82. Buddrus-Schiemann, K. *et al.* Analysis of N-acylhomoserine lactone dynamics in continuous  
574 cultures of *Pseudomonas putida* IsoF by use of ELISA and UHPLC/qTOF-MS-derived  
575 measurements and mathematical models. *Anal. Bioanal. Chem.* **406**, 6373–6383 (2014).
- 576 83. Erdönmez, D., Rad, A. Y. & Aksöz, N. Quorum sensing molecules production by nosocomial  
577 and soil isolates *Acinetobacter baumannii*. *Arch. Microbiol.* **199**, 1325–1334 (2017).
- 578 84. Swift, S. *et al.* Quorum sensing in *Aeromonas hydrophila* and *Aeromonas salmonicida*:  
579 Identification of the LuxR homologs AhyR<sub>i</sub> and AsaR<sub>i</sub> and their cognate N- acylhomoserine  
580 lactone signal molecules. *J. Bacteriol.* **179**, 5271–81 (1997).
- 581 85. Yamamoto, H. Viable but nonculturable state as a general phenomenon of non- sporeforming  
582 bacteria, and its modeling. *J. Infect. Chemother.* **6**, 112–114 (2000).
- 583 86. Huedo, P. *et al.* Two different rpf clusters distributed among a population of

- 584 Stenotrophomonas maltophilia clinical strains display differential diffusible signal factor  
585 production and virulence regulation. *J. Bacteriol.* **196**, 2431–2442 (2014).
- 586 87. Alavi, P. *et al.* The DSF Quorum Sensing System Controls the Positive Influence of  
587 Stenotrophomonas maltophilia on Plants. *PLoS One* **8**, e67103 (2013).
- 588 88. Vesty, E. F. *et al.* The decision to germinate is regulated by divergent molecular networks in  
589 spores and seeds. *New Phytol.* **211**, 952–966 (2016).
- 590 89. Johnson, M. *et al.* NCBI BLAST: a better web interface. *Nucleic Acids Res.* **36**, W5–W9  
591 (2008).

592

## 593 **Acknowledgments**

594 We thank Jeff Duckett and Sharon Pilkington for wild *Physcomitrella patens* samples; Zaynub  
595 Chaudhry and Xulyu Cao for lab assistance. We thank the University of Birmingham Genomics  
596 Facility for their sequencing service. The work was funded by a UK-Natural Environment Research  
597 Council (NERC) PhD Studentship for EFV (NE/I528218/1), a grant from the Birmingham-  
598 Nottingham Strategic Collaboration fund (BNSCF002) to JC/MG and University of Birmingham  
599 funding for ALW, SN, KJ and WT to carry out Masters projects. This work was also supported by  
600 funding from the Biotechnology and Biological Sciences Research Council (BBSRC; Award  
601 Number BB/R012415/1). MC is partly funded by the National Biofilms Innovation Centre (NBIC)  
602 which is an Innovation and Knowledge Centre funded by the Biotechnology and Biological Sciences  
603 Research Council, Innovate UK and Hartree Centre.

604

## 605 **Author Contributions**

606 EFV, MC, XL and JCC conceived and designed the study; EFV, ALW, SN, WT, KJ, NH, FG, XL  
607 and JCC performed experiments in the lab; EFV, ALW, SN, WT, KJ, NH and FG analysed data;  
608 EFV, SN, ALW, NH, FG, MC and JCC wrote sections of the manuscript. NH, MC and JCC revised  
609 and finalised the manuscript. All authors read and approved the submitted version.

610

611

## 612 **Additional information**

613

### 614 **Accession Codes**

615 All sequence data generated in this study has been deposited at GenBank and the accession numbers  
616 are given in Table 1.

617

### 618 **Competing interests**

619 The authors declare that the research was conducted in the absence of any commercial or financial  
620 relationships that could be construed as a potential conflict of interest.

621

### 622 **Data Availability Statement**

623 The raw data supporting the conclusions of the germination assays and AHL quantification will be  
624 made available by the authors, without undue reservation, to any qualified researcher.

625

## 626 **Figure legends**

### 627 **Figure 1. *N*-acyl HSLs can promote *Physcomitrella* spore germination.**

628 *P. patens* spores were germinated on media containing 0, 0.1 and 1 $\mu$ M *N*-acyl HSLs of varying chain  
629 lengths (C4-C12). The number of spores germinated were counted as a percentage of total spores on  
630 the plate. Both concentrations of *N*-acyl HSLs resulted in a faster rate of germination compared to  
631 control spores.

632 A) C4-HSL promotes germination of *P. patens* spores. Z-tests indicated significant differences in  
633 germination between treated and untreated spores on days 3 and 11 ( $P > |t| 0.0002$ ).

634 B) C6-HSL promotes germination of *P. patens* spores. Z tests indicated significant differences in  
635 germination between treated and untreated spores on days 3 and 11 ( $P > |t| 0.0002$ ). Treatment with the  
636 lower concentration of  $0.1\mu\text{M}$  was more effective in promoting germination on days 3 and 11 when  
637 compared to  $1\mu\text{M}$ .

638 C) C8-HSL promotes germination of *P. patens* spores. Z tests indicated significant differences in  
639 germination % between treated and untreated spores on days 3, 7 and 11 ( $P > |t| 0.0002$ ).

640 D) C10-HSL promotes *P. patens* spore germination. Z tests indicated significant differences in  
641 germination % between treated and untreated spores on days 3, 7 and 11 ( $P > |t| 0.0002$ ). Treatment  
642 with the lower concentration of  $0.1\mu\text{M}$  was significantly more effective in promoting germination on  
643 days 3 and 7 when compared to  $1\mu\text{M}$ .

644 E) C12-HSL promotes *P. patens* spore germination. Z tests indicated significant differences in  
645 germination % between treated and untreated spores on days 3, 7 and 11 ( $P > |t| 0.0002$ ). Treatment  
646 with the lower concentration of  $0.1\mu\text{M}$  was significantly more effective in promoting germination on  
647 days 3 and 7 when compared to  $1\mu\text{M}$ .

648 In all experiments, final germination efficiency was not affected with all treatments achieving a final  
649 germination of over 95%. Representative of more than 5 biological repeats. Error bars represent  $\pm$   
650 SEM.

651

652 **Figure 2. N-acyl HSLs inhibit *Physcomitrella* spore germination at concentrations above  $1\mu\text{M}$ .**

653 A) C4-C12 N-acyl HSLs were tested on *P. patens* spores at a concentration of  $5\mu\text{M}$  (light grey bars)  
654 compared to a solvent-matched control (dark grey bar). A snapshot of data at day 4 is shown: all chain  
655 lengths reduce germination. Significant differences between control and treatment are seen with a Z-  
656 test for C4-HSL ( $p=0.0007$ ), C8-HSL ( $p=0.0324$ ), C10-HSL ( $p<0.0002$ ) and C12-HSL ( $p=0.0324$ ) but  
657 not C6-HSL ( $p=0.0629$ ). \*  $p<0.05$ , \*\*\*  $p<0.001$ . Error bars represent  $\pm$ SEM.  $n>700$  spores for each  
658 data point. Representative of at least 3 biological repeats.

659

660 B) C10-HSL inhibits *P. patens* spore germination in a dose-dependent manner. C10-HSL was tested  
661 at  $5\mu\text{M}$  and  $10\mu\text{M}$  concentration against a solvent control. Significant differences are seen with a Z-  
662 test between control and both  $5\mu\text{M}$  and  $10\mu\text{M}$  C10-HSL on day 8, 9 and 11 ( $p<0.0002$ );  $5\mu\text{M}$  and  
663  $10\mu\text{M}$  C10-HSL are also significantly different from each other on day 8 ( $p<0.0002$ ), day 9 ( $p<0.0002$ )  
664 and day 11 ( $p=0.0056$ ). Error bars represent  $\pm$ SEM.  $n>500$  spores for each data point. Representative  
665 of 3 biological repeats.

666

667

668 **Figure 3. Side chain substitutions affect AHL activity during *Physcomitrella* spore germination.**

669 A)  $0.1\mu\text{M}$  of each HSL (N-acyl, 3-O or 3-OH) for C4-C12 chain length was tested against solvent  
670 control for effects on spore germination. A “snapshot” of germination on day 3 is shown. Asterisks  
671 represent significant (\* $p<0.05$ ; \*\* $p<0.01$ ) differences between a treatment and solvent control using a  
672 Kruskal-Wallis test and a Dunn’s post-hoc test. Generally, longer chain AHLs stimulate germination  
673 more, and AHLs without or with 3-O substitutions appear more potent than those with 3-OH  
674 substitutions at this concentration.

675 B) Summary of the optimal concentrations of AHLs for promoting *Physcomitrella* spore germination:  
676 full data is shown in Supplemental Figure 1.

677

678 **Figure 4. AHLs detected in bacterial isolates from Chew Valley and Stocks Reservoir.** No AHLs  
679 were detected from individual Lindley isolates for which we obtained high quality sequence. Numerical  
680 values on the legend scale are of peak area for detected analytes. A positive detection of an AHL was

681 considered as a chromatographic peak that has a signal to noise ratio of at least 5, displaying a peak  
682 retention time that matched that of authentic AHL synthetic standards.  
683  
684  
685  
686  
687

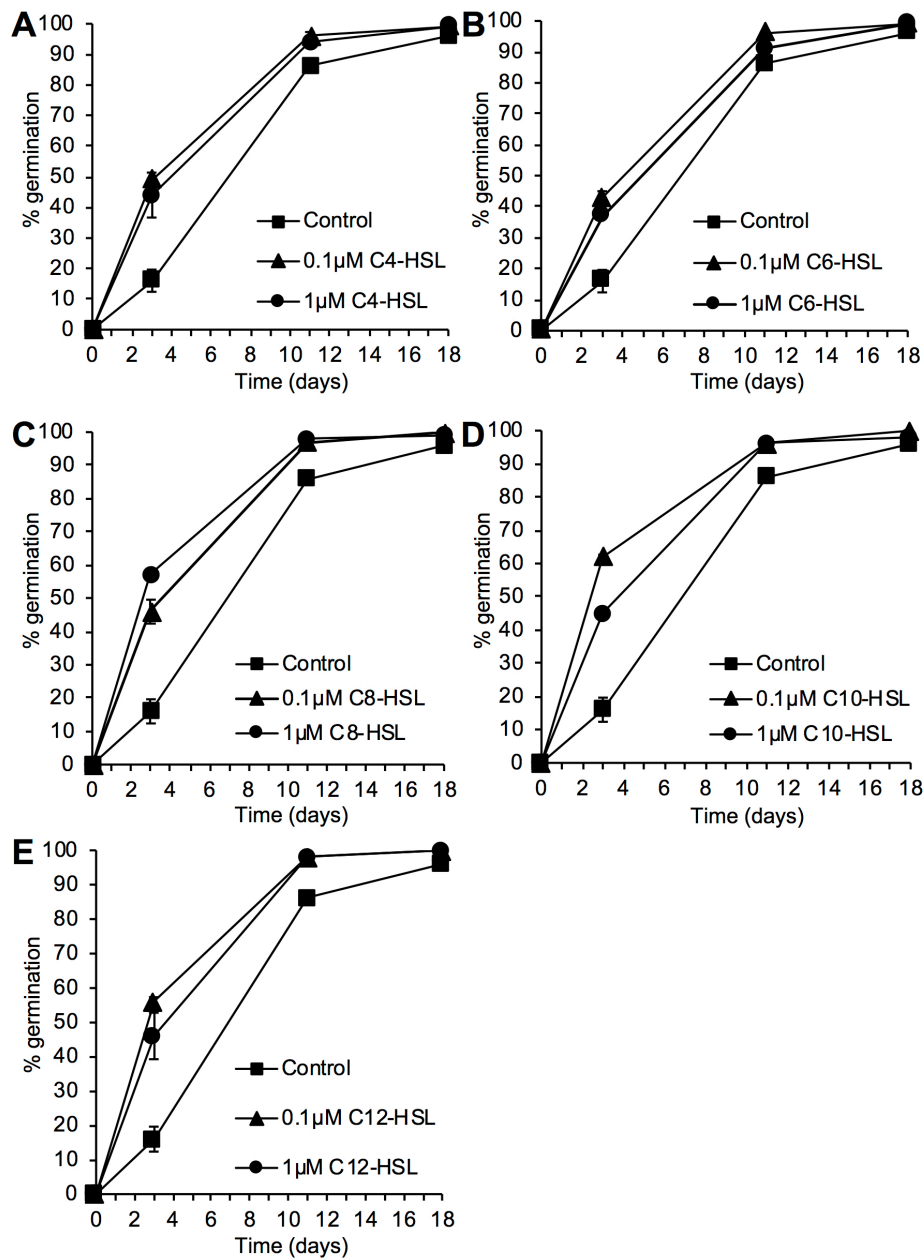

688

689 **Figure 1.**



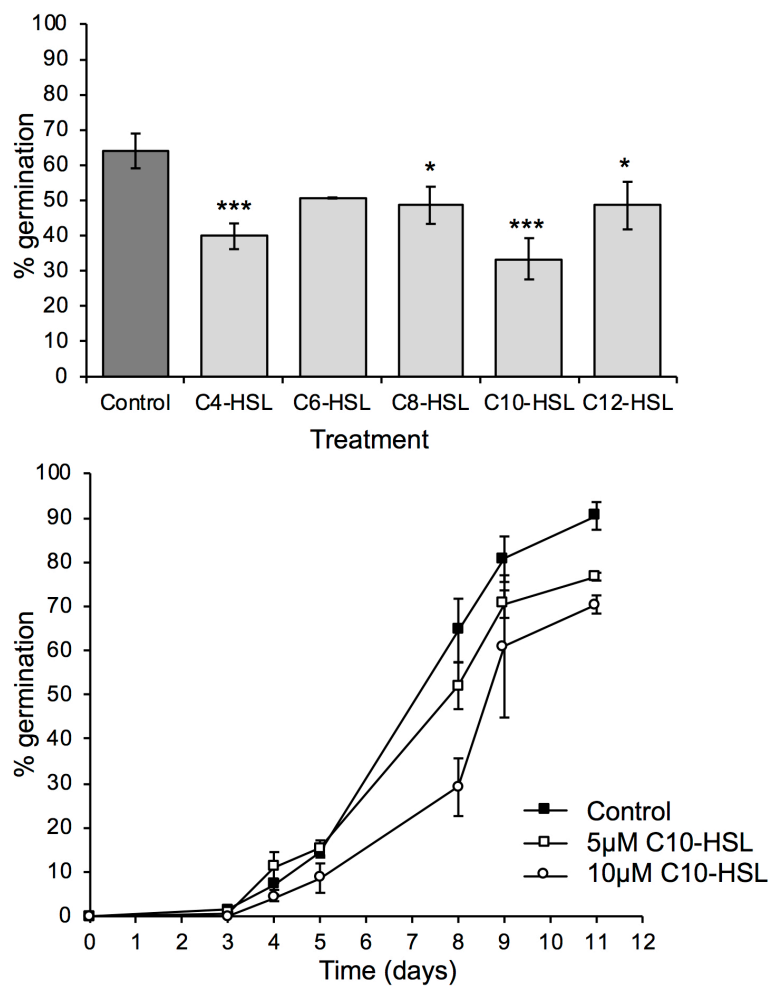

690

691 **Figure 2**

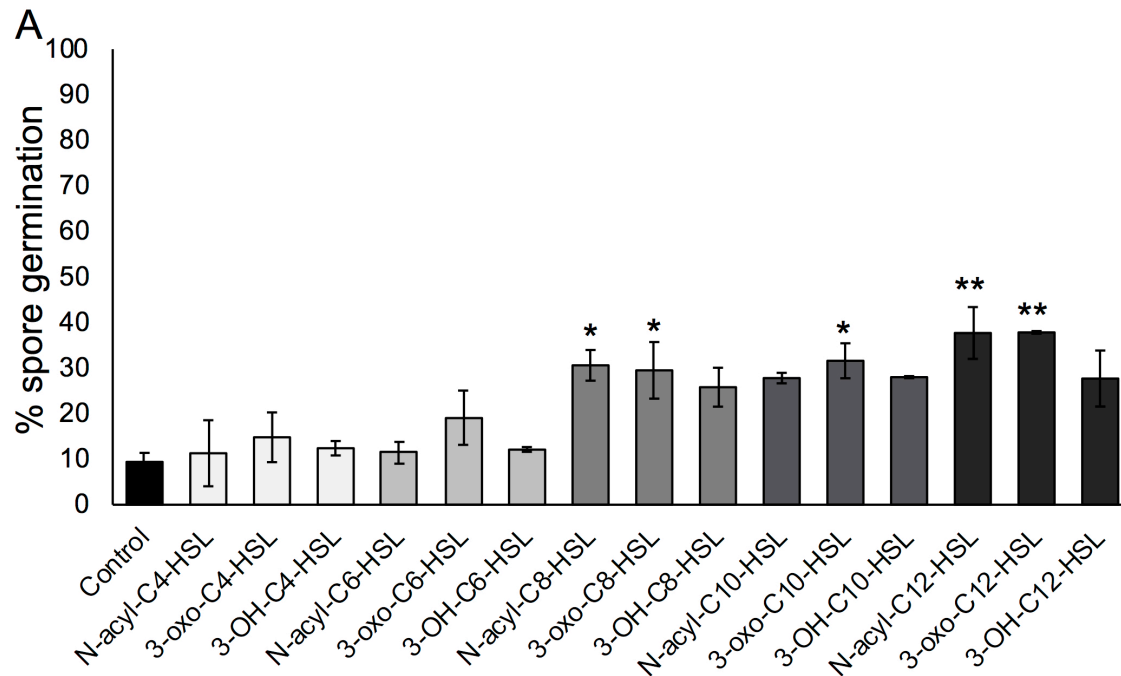

**B**

| Homoserine Lactone    | Works best at [concentration]                                    |
|-----------------------|------------------------------------------------------------------|
| <b>N-acyl-C10-HSL</b> | 2-10nM                                                           |
| <b>3-oxo-C10-HSL</b>  | 0.1 $\mu$ M                                                      |
| <b>3-OH-C10-HSL</b>   | 10nM                                                             |
| <b>N-acyl-C12-HSL</b> | 2nM                                                              |
| <b>3-oxo-C12-HSL</b>  | 0.1-1 $\mu$ M                                                    |
| <b>3-OH-C12-HSL</b>   | 1 $\mu$ M (but only small differences over 10nM-1 $\mu$ M range) |

692

693 **Figure 3.**

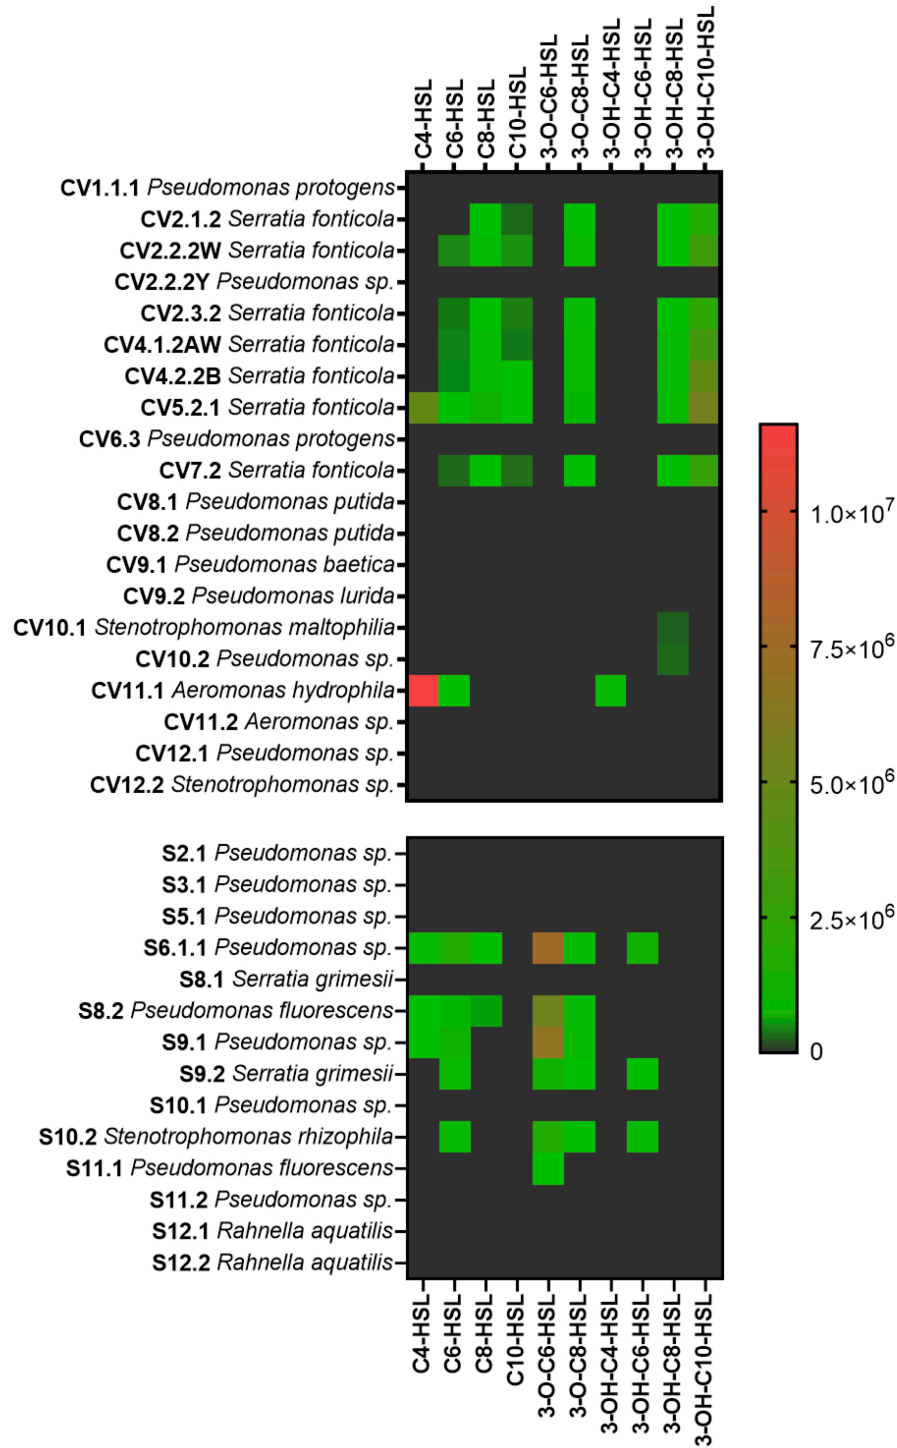

694  
695 **Figure 4.**

| Bacterial Isolate       | GenBank accession(s) of closest hit(s)                     | % match | Identification                      | GenBank accession |
|-------------------------|------------------------------------------------------------|---------|-------------------------------------|-------------------|
| <b>Chew Valley Lake</b> |                                                            |         |                                     |                   |
| CV1.1.1                 | CP017964.1                                                 | 100     | <i>Pseudomonas protegens</i>        | MH379708          |
| CV2.1.2                 | CP013913.1                                                 | >99     | <i>Serratia fonticola</i>           | MH379709          |
| CV2.2.1                 | MF872588.1; KX982223.1; AB859734.1; JF742664.1; AY800383.1 | 100     | <i>Acinetobacter sp.</i>            | MH379710          |
| CV2.2.2W                | CP013913.1                                                 | >99     | <i>Serratia fonticola</i>           | MH379711          |
| CV2.2.2Y                | CP025262.1                                                 | 100     | <i>Pseudomonas sp.</i>              | MH379712          |
| CV2.3.2                 | CP013913.1                                                 | >99     | <i>Serratia fonticola</i>           | MH379713          |
| CV3.3.2Y                | LT616972.1; FN678353.1                                     | 100     | <i>Pseudomonas baetica</i>          | MH379714          |
| CV4.1B                  | KT825741.1; KT767824.1; KC139422.1                         | 100     | <i>Pseudomonas sp.</i>              | MH379715          |
| CV4.1.2AW               | CP011354.1                                                 | >99     | <i>Serratia fonticola</i>           | MH379716          |
| CV4.2.2B                | CP013913.1                                                 | 100     | <i>Serratia fonticola</i>           | MH379717          |
| CV5.2.1                 | CP023956.1, CP013913.1, CP011254.1                         | 100     | <i>Serratia fonticola</i>           | MH379718          |
| CV6.3                   | CP013184.1; CP017964.1; CP022097.2                         | 100     | <i>Pseudomonas protegens</i>        | MH379719          |
| CV7.2                   | CP011254.1                                                 | 100     | <i>Serratia fonticola</i>           | MH379720          |
| CV8.1                   | JQ086574.1                                                 | >99     | <i>Pseudomonas putida</i>           | MH379721          |
| CV8.2                   | JQ086574.1                                                 | >99     | <i>Pseudomonas putida</i>           | MH379722          |
| CV8.4                   | CP031338.1; CP031422.1                                     | 100     | <i>Microbacterium oxydans</i>       | MN073508          |
| CV9.1                   | FN678353.1                                                 | 100     | <i>Pseudomonas baetica</i>          | MH379723          |
| CV9.2                   | CP023272.1                                                 | 100     | <i>Pseudomonas lurida</i>           | MH379724          |
| CV10.1                  | KT932956.1                                                 | >99     | <i>Stenotrophomonas maltophilia</i> | MH379725          |
| CV10.2                  | CP022097.2; CP017964.1; AP014522.1; CP003190.1;            | 100     | <i>Pseudomonas sp.</i>              | MH379726          |
| CV10.3                  | KT 932956.1; CP023271.1                                    | 100     | <i>Stenotrophomonas maltophilia</i> | MH379727          |
| CV10.4                  | CP013913.1, CP011254.1                                     | >99     | <i>Serratia fonticola</i>           | MH379728          |
| CV11.1                  | CP028568.1                                                 | 100     | <i>Aeromonas hydrophila</i>         | MH379729          |
| CV11.2                  | CP026228.1                                                 | >99     | <i>Aeromonas sp.</i>                | MH379730          |
| CV11.3                  | KX871891.1                                                 | >99     | <i>Acinetobacter guillouiae</i>     | MH379731          |
| CV12.1                  | CP022097.2; CP017964.1; AP014522.1; CP003190.1;            | 100     | <i>Pseudomonas sp.</i>              | MH379732          |
| CV12.2                  | CP023271.1                                                 | 100     | <i>Stenotrophomonas sp.</i>         | MH379733          |
| <b>Stocks Reservoir</b> |                                                            |         |                                     |                   |
| S2.1                    | KT695833.1; KJ601751.1; AM419154.2; AB680969.1             | 100     | <i>Pseudomonas sp.</i>              | MH379734          |
| S3.1                    | MG269607.1; KY457749.1; KT695833.1; KT767690.1             | 199     | <i>Pseudomonas sp.</i>              | MH379735          |
| S5.1                    | KJ601736.1                                                 | >99     | <i>Pseudomonas sp.</i>              | MH379736          |
| S6.1.1                  | MG269607.1; KY457749.1; KT695833.1; KT767690.1             | 100     | <i>Pseudomonas sp.</i>              | MH379737          |
| S8.1                    | KC951918.1                                                 | >99     | <i>Serratia grimesii</i>            | MH379738          |
| S8.2                    | MG461471.1                                                 | 100     | <i>Pseudomonas fluorescens</i>      | MH379739          |
| S9.1                    | MG461471.1; HE603509.1; HE603507.1; GU784939.1;            | >99     | <i>Pseudomonas sp.</i>              | MH379740          |
|                         | NR126220.1                                                 |         |                                     |                   |
| S9.2                    | KC951918.1                                                 | >99     | <i>Serratia grimesii</i>            | MH379741          |
| S10.1                   | MG461471.1; NR126220.1                                     | >99     | <i>Pseudomonas sp.</i>              | MH379742          |
| S10.2                   | CP007597.1                                                 | >99     | <i>Stenotrophomonas rhizophila</i>  | MH379743          |
| S11.1                   | LT907842.1                                                 | 100     | <i>Pseudomonas fluorescens</i>      | MH379744          |
| S11.2                   | MG461471.1; NR126220.1; HE603509.1; HE603507.1;            | >99     | <i>Pseudomonas sp.</i>              | MH379745          |
|                         | GU784939.1;                                                |         |                                     |                   |
| S12.1                   | KY606575.1                                                 | >99     | <i>Rahnella aquatilis</i>           | MH379746          |
| S12.2                   | CP003403.1                                                 | >99     | <i>Rahnella aquatilis</i>           | MH379747          |
| <b>Lindley</b>          |                                                            |         |                                     |                   |
| L1B                     | KP267838.1; NR041952.1                                     | >99     | <i>Pseudomonas abietaniphila</i>    | MH379748          |
| L3.1                    | MG269614.1; MG738244.1; MG571730.1                         | >99     | <i>Pseudomonas sp.</i>              | MH379749          |
| L6.1                    | KX588595.1; KT767887.1; KT767804.1; KR085861.1;            | 100     | <i>Pseudomonas sp.</i>              | MH379750          |
|                         | KR085860.1; KR085772.1; JQ995152.1; KF147119.1; JF312957.1 |         |                                     |                   |
| L6.2                    | KY800458.1; CP007597.1                                     | >99     | <i>Stenotrophomonas rhizophila</i>  | MH379751          |
| L6.3                    | KX588595.1; KT767887.1; KT767804.1; KR085861.1;            | 100     | <i>Pseudomonas sp.</i>              | MH379752          |
|                         | KR085860.1; KR085772.1; JQ995152.1; KF147119.1; JF312957.1 |         |                                     |                   |
| L10.1                   | KY800458.1; CP007597.1                                     | >99     | <i>Stenotrophomonas rhizophila</i>  | MH379753          |
| L11.1                   | KP267838.1                                                 | >99     | <i>Pseudomonas abietaniphila</i>    | MH379754          |
| L11.2                   | CP020383.1                                                 | >99     | <i>Bacillus cereus</i>              | MH379755          |
| L12.1                   | MG269607.1; KY457749.1; KT695833.1; KM221362.1;            | 100     | <i>Pseudomonas sp.</i>              | MH379756          |
|                         | KT767690.1                                                 |         |                                     |                   |
| L12.3                   | KR153186.1; JN392005.1; KT150204.1; KC876035.1;            | 100     | <i>Bacillus cereus</i>              | MH379757          |
|                         | KC709812.1; JN411483.1; HQ197382.1; FJ946999.1             |         |                                     |                   |

696  
697  
698  
699  
700

**Table 1. Identification of bacterial isolates from Chew Valley, Stocks Reservoir and Lindley using 16S rDNA sequencing.** Closest hits by BLAST, percentage identity and identification are shown for each isolate, along with the newly assigned GenBank accession number for each isolate.

701  
702

|              | Chew Valley (11 sporophytes' consortia) | Stocks (11 sporophytes' consortia) | Lindley (8 sporophytes' consortia) |
|--------------|-----------------------------------------|------------------------------------|------------------------------------|
| C4-HSL       | 2                                       | 0                                  | 0                                  |
| C6-HSL       | 0                                       | 7                                  | 0                                  |
| C8-HSL       | 8                                       | 1                                  | 0                                  |
| C10-HSL      | 0                                       | 0                                  | 0                                  |
| C12-HSL      | 0                                       | 0                                  | 0                                  |
| C14-HSL      | 0                                       | 0                                  | 0                                  |
| 3-O-C4-HSL   | 0                                       | 0                                  | 0                                  |
| 3-O-C6-HSL   | 0                                       | 7                                  | 0                                  |
| 3-O-C8-HSL   | 1                                       | 1                                  | 0                                  |
| 3-O-C10-HSL  | 0                                       | 0                                  | 0                                  |
| 3-O-C12-HSL  | 0                                       | 0                                  | 0                                  |
| 3-O-C14-HSL  | 0                                       | 1                                  | 0                                  |
| 3-OH-C4-HSL  | 0                                       | 0                                  | 0                                  |
| 3-OH-C6-HSL  | 0                                       | 2                                  | 1                                  |
| 3-OH-C8-HSL  | 7                                       | 1                                  | 1                                  |
| 3-OH-C10-HSL | 8                                       | 1                                  | 1                                  |
| 3-OH-C12-HSL | 0                                       | 0                                  | 0                                  |
| 3-OH-C14-HSL | 0                                       | 0                                  | 0                                  |

703

704

705 **Table 2. Frequency of AHL detection in bacterial consortia.** The number of times a particular AHL  
706 was detected in the consortium from a single isolated sporophyte is recorded.  
707
